# Supplementary material
Source: HighWire-hosted journal article supplement (https://mct.aacrjournals.org/content/suppl/2010/10/27/1535-7163.MCT-10-0552)
Supplement: Supp_Table_2.pdf [file Supp_Table_2.pdf]

**Table S2. Effect of paclitaxel on wild-type microtubule dynamics**

| Parameter                                       | Paclitaxel (nM) |                 |                 |                 |                 |                       |
|-------------------------------------------------|-----------------|-----------------|-----------------|-----------------|-----------------|-----------------------|
|                                                 | 0               | 1               | 3               | 10              | 30              | 50                    |
| <b>Growth</b>                                   |                 |                 |                 |                 |                 |                       |
| Rate ( $\mu\text{m}/\text{min}$ )               | 16.0 $\pm$ 0.8  | 13.0 $\pm$ 1.2* | 9.9 $\pm$ 0.7*  | 10.0 $\pm$ 0.6* | 10.8 $\pm$ 0.5* | 9.8 $\pm$ 0.8* (61)   |
| Duration (sec)                                  | 12.0 $\pm$ 1.1  | 8.0 $\pm$ 0.6*  | 6.6 $\pm$ 0.6*  | 6.2 $\pm$ 0.4*  | 7.4 $\pm$ 0.9*  | 5.7 $\pm$ 0.6* (48)   |
| Distance ( $\mu\text{m}$ )                      | 3.3 $\pm$ 0.4   | 1.8 $\pm$ 0.2*  | 1.1 $\pm$ 0.2*  | 1.1 $\pm$ 0.1*  | 1.3 $\pm$ 0.2*  | 0.9 $\pm$ 0.1* (27)   |
| <b>Shortening</b>                               |                 |                 |                 |                 |                 |                       |
| Rate ( $\mu/\text{min}$ )                       | 28.7 $\pm$ 2.3  | 20.7 $\pm$ 1.5* | 13.7 $\pm$ 0.9* | 12.2 $\pm$ 1.2* | 11.2 $\pm$ 0.6* | 9.4 $\pm$ 0.5* (33)   |
| Duration (sec)                                  | 10.9 $\pm$ 1.0  | 8.3 $\pm$ 0.7   | 5.9 $\pm$ 0.3*  | 7.3 $\pm$ 0.8*  | 6.3 $\pm$ 0.5   | 5.5 $\pm$ 0.3* (50)   |
| Distance ( $\mu\text{m}$ )                      | 5.1 $\pm$ 0.5   | 2.8 $\pm$ 0.3*  | 1.3 $\pm$ 0.1*  | 1.6 $\pm$ 0.4*  | 1.3 $\pm$ 0.2*  | 0.9 $\pm$ 0.1* (18)   |
| <b>Frequency (<math>\text{min}^{-1}</math>)</b> |                 |                 |                 |                 |                 |                       |
| Catastrophe                                     | 1.5 $\pm$ 0.1   | 2.4 $\pm$ 0.3*  | 1.8 $\pm$ 0.3   | 1.7 $\pm$ 0.3   | 1.2 $\pm$ 0.2   | 1.8 $\pm$ 0.3 (120)   |
| Rescue                                          | 6.5 $\pm$ 0.5   | 7.3 $\pm$ 0.4   | 10.0 $\pm$ 0.7* | 8.0 $\pm$ 1.0   | 8.8 $\pm$ 1.0*  | 9.8 $\pm$ 1.2* (151)  |
| <b>Percentage of time</b>                       |                 |                 |                 |                 |                 |                       |
| Growing                                         | 30.6 $\pm$ 2.3  | 22.1 $\pm$ 1.7* | 14.4 $\pm$ 2.0* | 16.5 $\pm$ 3.0* | 14.6 $\pm$ 2.6* | 9.5 $\pm$ 1.5* (31)   |
| Shortening                                      | 20.3 $\pm$ 1.8  | 23.7 $\pm$ 3.0  | 15.0 $\pm$ 2.4  | 15.6 $\pm$ 2.4  | 11.0 $\pm$ 2.1* | 12.3 $\pm$ 2.5* (61)  |
| Pausing                                         | 49.0 $\pm$ 3.0  | 54.2 $\pm$ 4.4  | 70.5 $\pm$ 4.0* | 67.9 $\pm$ 5.0* | 74.5 $\pm$ 3.3* | 78.2 $\pm$ 3.4* (160) |
| Dynamicity ( $\mu\text{m}/\text{min}$ )         | 8.8 $\pm$ 0.8   | 7.7 $\pm$ 1.0   | 3.5 $\pm$ 0.6*  | 3.9 $\pm$ 0.9*  | 2.8 $\pm$ 0.4*  | 2.4 $\pm$ 0.3* (27)   |
| Microtubules measured                           | 33              | 15              | 10              | 15              | 15              | 10                    |

Values represent the mean  $\pm$  standard error.

Numbers in parentheses are percent of control (untreated wild-type cells).

Catastrophe: the transition from either growth or pause phase to shortening phase.

Rescue: the transition from shortening phase to either growth or pause phase.

Dynamicity: the total length change of individual microtubule during life history.

\*  $p < 0.05$  compared to cells at 0 concentration of paclitaxel.
